# Supplementary material for: Development, validation, and results of a national endoscopy safety attitudes questionnaire (Endo-SAQ)
Source: PubMed Central journal article supplement — Endosc Int Open. 2023 Jul 26;11(7):E679–89. doi: 10.1055/a-2112-5105 (PMC10370487; doi:10.1055/a-2112-5105), 2023-07-26
Supplement: 10-1055-a-2112-5105_21178420.r2suppl.pdf.pdf [file 10-1055-a-2112-5105_21178420.r2suppl.pdf.pdf]

## Supplementary material

## ENDO-SAQ SURVEY

## DEMOGRAPHIC DATA

1. Endoscopy service – Please choose your region (MANDATORY)
  - a. East Midlands
  - b. East of England
  - c. Greater London
  - d. North East
  - e. North West
  - f. Northern Ireland
  - g. Republic of Ireland
  - h. Scotland
  - i. South East
  - j. South West
  - k. Wales
  - l. West Midlands
  - m. Yorkshire and the Humber
  
2. What sector is your endoscopy service in? (MANDATORY)
  - a. NHS/public sector
  - b. Independent/private sector
  
3. Does your endoscopy unit undertake Bowel Cancer Screening? (MANDATORY)
  - a. Yes
  - b. No
  
4. Is your endoscopy unit JAG accredited? (MANDATORY)
  - a. Yes
  - b. No
  
5. Role (choose one)
  - a. Administrator/non-clinical manager
  - b. Decontamination Technician
  - c. Endoscopist – Associate specialist
  - d. Endoscopist – Clinical endoscopist (including nurse endoscopist)
  - e. Endoscopist – Consultant
  - f. Endoscopist – Medical Trainee
  - g. Endoscopist – Surgical trainee
  - h. Endoscopy Nurse
  - i. Healthcare Assistant
  - j. Porter
  - k. Screening Practitioner
  - l. Other – please state
  
6. Gender
  - a. M
  - b. F
  - c. Non-binary/third gender
  - d. Prefer not to say

## Supplementary material

7. Age range
  - a. 16-24
  - b. 25 – 34
  - c. 35 – 44
  - d. 45 – 54
  - e. 55 – 64
  - f. 65 and older
  
8. Time in this role
  - a. < 6 months
  - b. 6 to 11 months
  - c. 1 to 2 years
  - d. 3 to 4 years
  - e. 5 to 10 years
  - f. 11 to 20 years
  - g. 21 years or more

**QUESTIONS**

Please answer the following items with respect to your specific endoscopy unit.

Option 1-5

1 = Strongly disagree

2 = Slightly disagree

3 = Neutral

4 = Slightly agree

5 = Strongly agree

|          | Question Item                                                                                                                   | Rating (1-5) |
|----------|---------------------------------------------------------------------------------------------------------------------------------|--------------|
| TEAMWORK | 1. In this endoscopy unit, it is difficult to speak up if I perceive a problem with patient care.                               |              |
|          | 2. Disagreements in this endoscopy unit are addressed appropriately (i.e., not who is right, but what is best for the patient). |              |
|          | 3. I have the support I need from other colleagues to care for patients.                                                        |              |
|          | 4. It is easy for staff here to ask questions when there is something that they do not understand.                              |              |
|          | 5. The endoscopy staff members here work together as a well-coordinated team.                                                   |              |
| SAFETY   | 6. I would feel safe being treated here as a patient.                                                                           |              |
|          | 7. Patient safety issues are handled appropriately in this endoscopy unit.                                                      |              |

## Supplementary material

|                    |                                                                                                               |  |
|--------------------|---------------------------------------------------------------------------------------------------------------|--|
|                    | 8. I know how and where to direct questions regarding patient safety in this endoscopy unit.                  |  |
|                    | 9. I receive appropriate feedback about my performance.                                                       |  |
|                    | 10. In this endoscopy unit, it is difficult to discuss errors openly.                                         |  |
|                    | 11. I am encouraged by my colleagues to report any patient safety concerns I may have.                        |  |
|                    | 12. The culture in this endoscopy unit encourages learning from the errors of others.                         |  |
|                    | 13. My suggestions about patient safety would be discussed and acted upon if I expressed them to senior staff |  |
| JOB SATISFACTION   | 14. I like my job.                                                                                            |  |
|                    | 15. Working here is like being part of a large team                                                           |  |
|                    | 16. This is a good place to work.                                                                             |  |
|                    | 17. I am proud to work in this endoscopy unit.                                                                |  |
|                    | 18. Morale in this endoscopy unit is high.                                                                    |  |
| STRESS RECOGNITION | 19. If my workload becomes excessive, my performance is impaired.                                             |  |
|                    | 20. I am less effective at work when fatigued.                                                                |  |
|                    | 21. I am more likely to make errors in tense or hostile situations.                                           |  |
|                    | 22. Fatigue impairs my performance during emergency/high-demand situations                                    |  |
| MANAGEMENT         | 23. Endoscopy unit management supports my daily efforts                                                       |  |
|                    | 24. Endoscopy unit management doesn't knowingly compromise patient safety                                     |  |
|                    | 25. Endoscopy unit management is doing a good job                                                             |  |
|                    | 26. Colleagues in difficulty are dealt with constructively by our endoscopy unit                              |  |
|                    | 27. I get adequate, timely info about events that might affect my work, from endoscopy unit management        |  |
| WORKING CONDITIONS | 28. The levels of staffing in this endoscopy unit are sufficient to handle the number of patients.            |  |
|                    | 29. This endoscopy unit does a good job of training new staff.                                                |  |
|                    | 30. All the necessary information for cases is routinely available to me.                                     |  |
|                    | 31. All trainees/students in my discipline (e.g. endoscopy, nursing, admin) are adequately supervised.        |  |
|                    | 32. I experience good working relationships with nurses in this endoscopy unit.                               |  |
|                    | 33. I experience good working relationships with endoscopists in this endoscopy unit.                         |  |
|                    | 34. I experience good working relationships with other staff in this endoscopy unit.                          |  |
|                    | 35. Communication breakdowns that lead to delays in delivery of care are common.                              |  |

## Supplementary material

## CVI CALCULATIONS

| QUESTION NUMBER | RELEVANCE |       | CLARITY |       |
|-----------------|-----------|-------|---------|-------|
|                 | I-CVI     | S-CVI | I-CVI   | S-CVI |
| 1               | 1         | 0.97  | 0.6     | 0.92  |
| 2               | 1         |       | 1       |       |
| 3               | 1         |       | 1       |       |
| 4               | 1         |       | 0.8     |       |
| 5               | 1         |       | 0.8     |       |
| 6               | 1         |       | 1       |       |
| 7               | 1         |       | 1       |       |
| 8               | 1         |       | 0.8     |       |
| 9               | 1         |       | 1       |       |
| 10              | 1         |       | 1       |       |
| 11              | 1         |       | 1       |       |
| 12              | 1         |       | 1       |       |
| 13              | 1         |       | 1       |       |
| 14              | 1         |       | 1       |       |
| 15              | 1         |       | 1       |       |
| 16              | 0.6       |       | 0.6     |       |
| 17              | 1         |       | 1       |       |
| 18              | 1         |       | 1       |       |
| 19              | 1         |       | 1       |       |
| 20              | 1         |       | 1       |       |
| 21              | 1         |       | 1       |       |
| 22              | 1         |       | 1       |       |
| 23              | 1         |       | 1       |       |
| 24              | 0.8       |       | 0.8     |       |
| 25              | 1         |       | 1       |       |
| 26              | 1         |       | 1       |       |
| 27              | 0.8       |       | 0.4     |       |
| 28              | 0.8       |       | 0.8     |       |
| 29              | 1         |       | 1       |       |
| 30              | 1         |       | 0.8     |       |
| 31              | 0.8       |       | 0.8     |       |
| 32              | 1         |       | 1       |       |
| 33              | 1         |       | 1       |       |
| 34              | 1         |       | 1       |       |
| 35              | 1         |       | 1       |       |
| 36              | 1         |       | 1       |       |

Table 1. Content validity indices – item CVI (I-CVI) and scale CVI (S-CVI) of the preliminary version of Endo-SAQ.

## Supplementary material

## Comparisons to other studies

| Study / Author             | Country      | Setting                  | Participants            |        | Mean scores (SD) |      |      |      |      |      |
|----------------------------|--------------|--------------------------|-------------------------|--------|------------------|------|------|------|------|------|
|                            |              |                          | Type                    | Number | TW               | SC   | JS   | SR   | PM   | WC   |
| Endo-SAQ                   | UK & Ireland | Endoscopy                | Endoscopy staff         | 453    | 81.9             | 82.8 | 80.2 | 72.8 | 74.1 | 77.5 |
| Goras 2017 [1]             | Sweden       | Surgery                  | Operating theatre staff | 332    | 71.7             | 66.2 | 78.9 | 62.9 | 57.9 | 66.8 |
| Gabrani 2015 [2]           | Albania      | Generic                  | Physicians              | 209    | 52.3             | 38.7 | 39.5 | 49.7 | 46.8 | 42.4 |
|                            |              |                          | Nurses                  | 132    | 45.7             | 36.8 | 46.7 | 40.6 | 44.8 | 29.2 |
| Raftopoulos et al 2011 [3] | Cyprus       | Maternity                | Midwives                | 106    | 58.0             | 55.8 | 66.2 | 50.6 | 52.1 | 55.0 |
| Relihan et al 2009 [4]     | Ireland      | Acute medical unit (AMU) | AMU staff               | 55     | 75.6             | 71.0 | 67.2 | 74.5 | 48.9 | 59.8 |

Table 2. Comparison of mean domains scores across different versions of the safety attitudes questionnaire (SAQ). TW = teamwork, SC = safety climate, JS = job satisfaction, SR = stress recognition, PM = perceptions of management, WC = working conditions

## References

1. Göras, C., et al., *Interprofessional team assessments of the patient safety climate in Swedish operating rooms: a cross-sectional survey*. *BMJ Open*, 2017. **7**(9): p. e015607.
2. Gabrani, A., et al., *Application of the Safety Attitudes Questionnaire (SAQ) in Albanian hospitals: a cross-sectional study*. *BMJ Open*, 2015. **5**(4): p. e006528.
3. Raftopoulos, V., N. Savva, and M. Papadopoulou, *Safety Culture in the Maternity Units: a census survey using the Safety Attitudes Questionnaire*. *BMC Health Services Research*, 2011. **11**(1): p. 238.
4. Relihan, E., et al., *Measuring and benchmarking safety culture: application of the safety attitudes questionnaire to an acute medical admissions unit*. *Irish Journal of Medical Science*, 2009. **178**(4): p. 433.

## Supplementary material

## PSYCHOMETRICS

Factor loadings, average variance extracted (AVE), Cronbach's Alpha and composite reliability

| DOMAIN (factor)                 | ITEM (variable) | FACTOR LOADING | AVE   | CRONBACH'S ALPHA | COMPOSITE RELIABILITY |
|---------------------------------|-----------------|----------------|-------|------------------|-----------------------|
| <b>Teamwork</b>                 | Q1              | 0.729          | 0.599 | 0.817            | 0.882                 |
|                                 | Q2              | 0.778          |       |                  |                       |
|                                 | Q3              | 0.813          |       |                  |                       |
|                                 | Q4              | 0.761          |       |                  |                       |
|                                 | Q5              | 0.787          |       |                  |                       |
| <b>Safety climate</b>           | Q6              | 0.841          | 0.631 | 0.873            | 0.931                 |
|                                 | Q7              | 0.821          |       |                  |                       |
|                                 | Q8              | 0.833          |       |                  |                       |
|                                 | Q9              | 0.753          |       |                  |                       |
|                                 | Q10             | 0.625          |       |                  |                       |
|                                 | Q11             | 0.773          |       |                  |                       |
|                                 | Q12             | 0.820          |       |                  |                       |
|                                 | Q13             | 0.865          |       |                  |                       |
| <b>Job satisfaction</b>         | Q14             | 0.764          | 0.750 | 0.886            | 0.937                 |
|                                 | Q15             | 0.862          |       |                  |                       |
|                                 | Q16             | 0.939          |       |                  |                       |
|                                 | Q17             | 0.915          |       |                  |                       |
|                                 | Q18             | 0.839          |       |                  |                       |
| <b>Stress recognition</b>       | Q19             | 0.787          | 0.694 | 0.846            | 0.901                 |
|                                 | Q20             | 0.855          |       |                  |                       |
|                                 | Q21             | 0.868          |       |                  |                       |
|                                 | Q22             | 0.821          |       |                  |                       |
| <b>Perception of management</b> | Q23             | 0.905          | 0.689 | 0.874            | 0.916                 |
|                                 | Q24             | 0.642          |       |                  |                       |
|                                 | Q25             | 0.886          |       |                  |                       |
|                                 | Q26             | 0.869          |       |                  |                       |
|                                 | Q27             | 0.822          |       |                  |                       |
| <b>Working conditions</b>       | Q28             | 0.525          | 0.531 | 0.809            | 0.898                 |
|                                 | Q29             | 0.830          |       |                  |                       |
|                                 | Q30             | 0.729          |       |                  |                       |
|                                 | Q31             | 0.786          |       |                  |                       |
|                                 | Q32             | 0.799          |       |                  |                       |
|                                 | Q33             | 0.753          |       |                  |                       |
|                                 | Q34             | 0.823          |       |                  |                       |
|                                 | Q35             | 0.498          |       |                  |                       |

Table 1. Factor loading, average variance extracted (AVE), Cronbach's alpha and composite reliability for each factor (domain).

## Supplementary material

## Discriminant validity

Inter-construct correlation was performed as a measure of discriminant validity. The square root of a construct's AVE ( $\sqrt{\text{AVE}}$ ) must be greater than the correlation between the construct and any other construct. This criterion was met for all correlations except the correlation between teamwork and safety climate and working conditions and perception of management (Table 2).

| DOMAIN                   | $\sqrt{\text{AVE}}$ | Teamwork | Safety climate | Job satisfaction | Stress recognition | Perception of management | Working conditions |
|--------------------------|---------------------|----------|----------------|------------------|--------------------|--------------------------|--------------------|
| Teamwork                 | <b>0.774</b>        | -        |                |                  |                    |                          |                    |
| Safety climate           | <b>0.794</b>        | 0.811**  | -              |                  |                    |                          |                    |
| Job satisfaction         | <b>0.866</b>        | 0.703**  | 0.720**        | -                |                    |                          |                    |
| Stress recognition       | <b>0.833</b>        | -0.109*  | -0.081         | -0.087           | -                  |                          |                    |
| Perception of management | <b>0.830</b>        | 0.711**  | 0.733**        | 0.738**          | -0.106*            | -                        |                    |
| Working conditions       | <b>0.729</b>        | 0.701**  | 0.697**        | 0.727**          | -0.118*            | 0.735**                  | -                  |

Table 2. Correlation coefficients ( $r$ ) of domains by mean ratings per domain.  $\sqrt{\text{AVE}}$  (square root of average variance extracted) is shown in the first column in bold per domain. \* $p < 0.05$ , \*\* $p < 0.01$  (2-tailed).
